# Supplementary material for: In situ X-ray Raman spectroscopy and magnetic susceptibility study on the Li[Li0.15Mn1.85]O4 oxygen anion redox reaction
Source: Royal Society of Chemistry journal article supplement (doi:10.1039/c9cc09051g), 2020-01-01
Supplement: c9cc09051g1.pdf [file c9cc09051g1.pdf]

# Supplementary Information

## In situ X-ray Raman spectroscopy and magnetic susceptibility study on $\text{Li}[\text{Li}_{0.15}\text{Mn}_{1.85}]\text{O}_4$ oxygen anion redox reaction

Kazuhiko Mukai,\* Takamasa Nonaka, Takeshi Uyama, and Yusaku F. Nishimura

*Toyota Central Research and Development Laboratories, Inc., 41-1 Yokomichi, Nagakute,  
Aichi 480-1192, Japan*

\*E-mail: e1089@mosk.tytlabs.co.jp

Phone: +81-561-71-7698. Fax: +81-561-63-6119

### Table of Contents

1. Experimental
2. Fig. S1: Charge/discharge curves of the Al-laminated cell
3. Fig. S2: Setup and arrangements for the XRS/XRD measurements
4. Fig. S3: Charge/discharge curves for the  $\chi$  measurements
5. Table S1: Structural parameters of the  $\text{Li}[\text{Li}_{0.15}\text{Mn}_{1.85}]\text{O}_4$  sample
6. Fig. S4: O *K*-edge spectrum of  $\text{Li}_2\text{CO}_3$
7. Fig. S5:  $\chi$  ( $\chi^{-1}$ ) of the  $y = 0.11, 0.22,$  and  $0.49$  samples
8. Table S2: Curie-Weiss parameters of the  $\text{Li}_{1-y}[\text{Li}_{0.15}\text{Mn}_{1.85}]\text{O}_4$  samples
9. References

---

\*To whom correspondence should be addressed

# Experimental

## Preparation and characterization

A powder sample of  $\text{Li}[\text{Li}_{0.15}\text{Mn}_{1.85}]\text{O}_4$  was prepared by a two-step solid-state reaction technique as previously reported.<sup>1</sup> The obtained sample was characterized by X-ray diffraction with Fe- $K\alpha$  radiation (D8 ADVANCE, Bruker AXS) and scanning electron microscopy (S-3600 N, Hitachi High-Technologies). Rietveld analysis was performed using the RIETAN-FP software,<sup>2</sup> and the crystal structure was drawn using the VESTA software.<sup>3</sup>

## Electrochemical measurements

The electrochemical properties of  $\text{Li}[\text{Li}_{0.15}\text{Mn}_{1.85}]\text{O}_4$  were examined in a non-aqueous lithium cell. A mixed electrode (diameter = 16 mm) consisting of 88 wt%  $\text{Li}[\text{Li}_{0.15}\text{Mn}_{1.85}]\text{O}_4$ , 6 wt% acetylene black (AB, Denka), and 6 wt% polyvinylidene fluoride (PVdF, Kureha) was used as the working electrode, and a lithium metal sheet pressed onto a stainless-steel (SUS) plate (diameter = 19 mm) was used as the counter electrode. The electrolyte was 1 M  $\text{LiPF}_6$  dissolved in ethylene carbonate (EC)/dimethyl carbonate (DMC) (EC/DMC = 3/7 by volume, Kishida Chemical). Two sheets of the porous polyethylene membrane (TonenGeneral Sekiyu K. K.) were used as a separator. The cell was fabricated in an Ar-filled glove box, and then operated at a current of 0.3 mA ( $\simeq 0.15 \text{ mA}\cdot\text{cm}^{-2}$ ) at 298 K. The voltage range was 3.0–5.0 V for initial three cycles, and then changed to 3.0–5.3 V for subsequent thirty cycles. The charge/discharge curves of the initial three cycles are shown in Fig. 1(c), while those of the subsequent thirty cycles are shown in Fig. 1(d).

## In situ XRS/XAS measurements

Recently, we developed an in situ XRS system to clarify the electronic structures of  $\text{C}_6\text{Li}$  and  $\text{C}_{12}\text{Li}$ .<sup>4</sup> We used the same XRS system to investigate the O  $K$ -edge spectra of  $\text{Li}_{1-y}[\text{Li}_{0.15}\text{Mn}_{1.85}]\text{O}_4$  samples with  $y \geq 0$ . The lithium cell was packed into an Al-laminated film with a size of 80 mm  $\times$  50 mm and exposed to hard X-rays at the BL33XU beamline

at SPring-8. The mix electrode was prepared by the same method described above, but a lithium metal sheet (diameter = 19 mm) without the SUS plate was used as the counter electrode. The thickness of the mix electrode was 53  $\mu\text{m}$  and the weight of the active material ( $\text{Li}[\text{Li}_{0.15}\text{Mn}_{1.85}]\text{O}_4$ ) was 21.38 mg. Before the XRS/XAS measurements, the Al-laminated cell was operated at 3.0–4.2 V for three cycles as a conditioning. The applied current was 0.3 mA and the environment temperature was 298 K. As shown in Fig. S1, these charge/discharge curves almost trace those in Fig. 1(c), suggesting that in situ lithium cell was successfully fabricated.

After charging the Al-laminated cell up to 4.5 or 5.3 V at the current of 0.3 mA, XRS/XAS measurements were performed at  $\sim 298$  K under an open circuit condition (not monitored during the measurements). Fig. S2(a) shows the experimental setup for the in situ XRS/XAS measurements. Furthermore, Figs. S2(b) and S2(c) show schematic arrangements of the Al-laminated cell for the XRS and XAS measurements, respectively. The Al-laminated cell was slightly tilted for the XRS measurements, where the angle between the Al-laminated cell and incident X-ray was  $5^\circ$ . We selected an energy of 9.8 keV as the incident X-ray because signals of scattered X-ray reached the maximum at 9.8 keV in the case of XRS measurements on  $\text{C}_6\text{Li}$  and  $\text{C}_{12}\text{Li}$ .<sup>4</sup> However, the acquisition time for one XAS spectrum was at least 11 h. We also measured the O *K*-edge spectrum of  $\text{Li}_2\text{CO}_3$  (Wako Pure Chemical Industries) with an acquisition time of 24 min. After each XRS measurement, Mn *K*-edge X-ray absorption near edge structure and extended X-ray absorption fine structure spectra were acquired by conventional XAS measurements. In contrast to the XRS measurements, the Al-laminated cell was set to be perpendicular to the incident X-ray. The analysis region for the XAS measurements was estimated to  $3 \text{ mm} \times 10 \mu\text{m}$ , which was approximately  $1.5 \times 10^{-2}$  % of the surface area of the mix electrode ( $\simeq 2 \text{ cm}^2$ ). The analysis region for the XRS measurements is similar with that for the XAS measurements.

## $\chi$ measurements

The  $\chi$  ( $= M/H$ ) values were determined using a superconducting quantum interference

device (SQUID) magnetometer (MPMS, Quantum Design), where  $M$  is the magnetization and  $H$  is the applied magnetic field.  $M$  was measured in field-cooling mode with  $H = 10$  kOe and cooling from 400 to 5 K. Delithiated  $\text{Li}_{1-y}[\text{Li}_{0.15}\text{Mn}_{1.85}]\text{O}_4$  samples with  $y > 0$  were prepared by the electrochemical reaction. Each  $\text{Li}[\text{Li}_{0.15}\text{Mn}_{1.85}]\text{O}_4/\text{Li}$  cell was charged up to a desired Li composition at the current of 0.3 mA, and rested for 5 h to reach a stable open circuit voltage. Charge curves for the  $\chi$  measurements are shown in Fig. S3. The weight of active material ( $\text{Li}_{1-y}[\text{Li}_{0.15}\text{Mn}_{1.85}]\text{O}_4$ ) was approximately 15 mg. Each mix electrode consisting of  $\text{Li}_{1-y}[\text{Li}_{0.15}\text{Mn}_{1.85}]\text{O}_4$ , AB, and PVdF was removed from the cell in the Ar-filled glove box, and packed into two sheets (20 mm  $\times$  20 mm) of Al foils to avoid reactions with moist air. Finally the  $\text{Li}_{1-y}[\text{Li}_{0.15}\text{Mn}_{1.85}]\text{O}_4$  sample was fixed to the sample rod of the SQUID magnetometer with a Cu wire. Above procedure was essentially same with  $\chi$  measurements on  $\text{Li}_{1-y}[\text{Ni}_{1/2}\text{Mn}_{3/2}]\text{O}_4$ <sup>5</sup> and  $\text{Li}_{1+y}[\text{Li}_{1/3}\text{Ti}_{5/3}]\text{O}_4$ .<sup>6</sup>

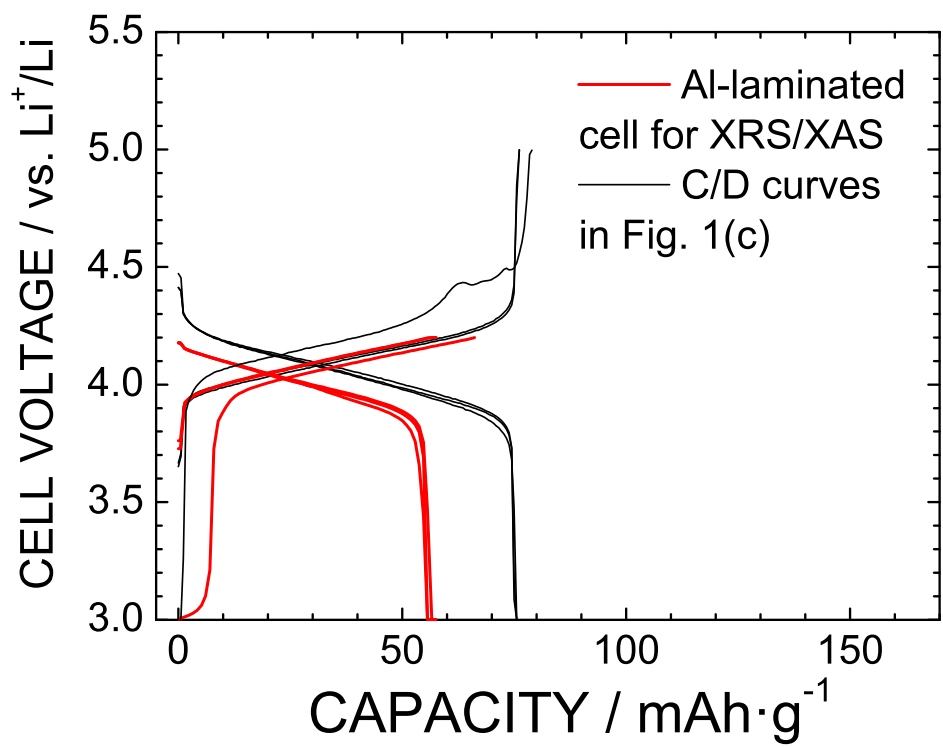

**Fig. S1:** Conditioning charge/discharge (C/D) curves of the Al-laminated lithium cell for the XRS/XAS measurements. C/D curves in Fig. 1(c) are also shown for comparison.

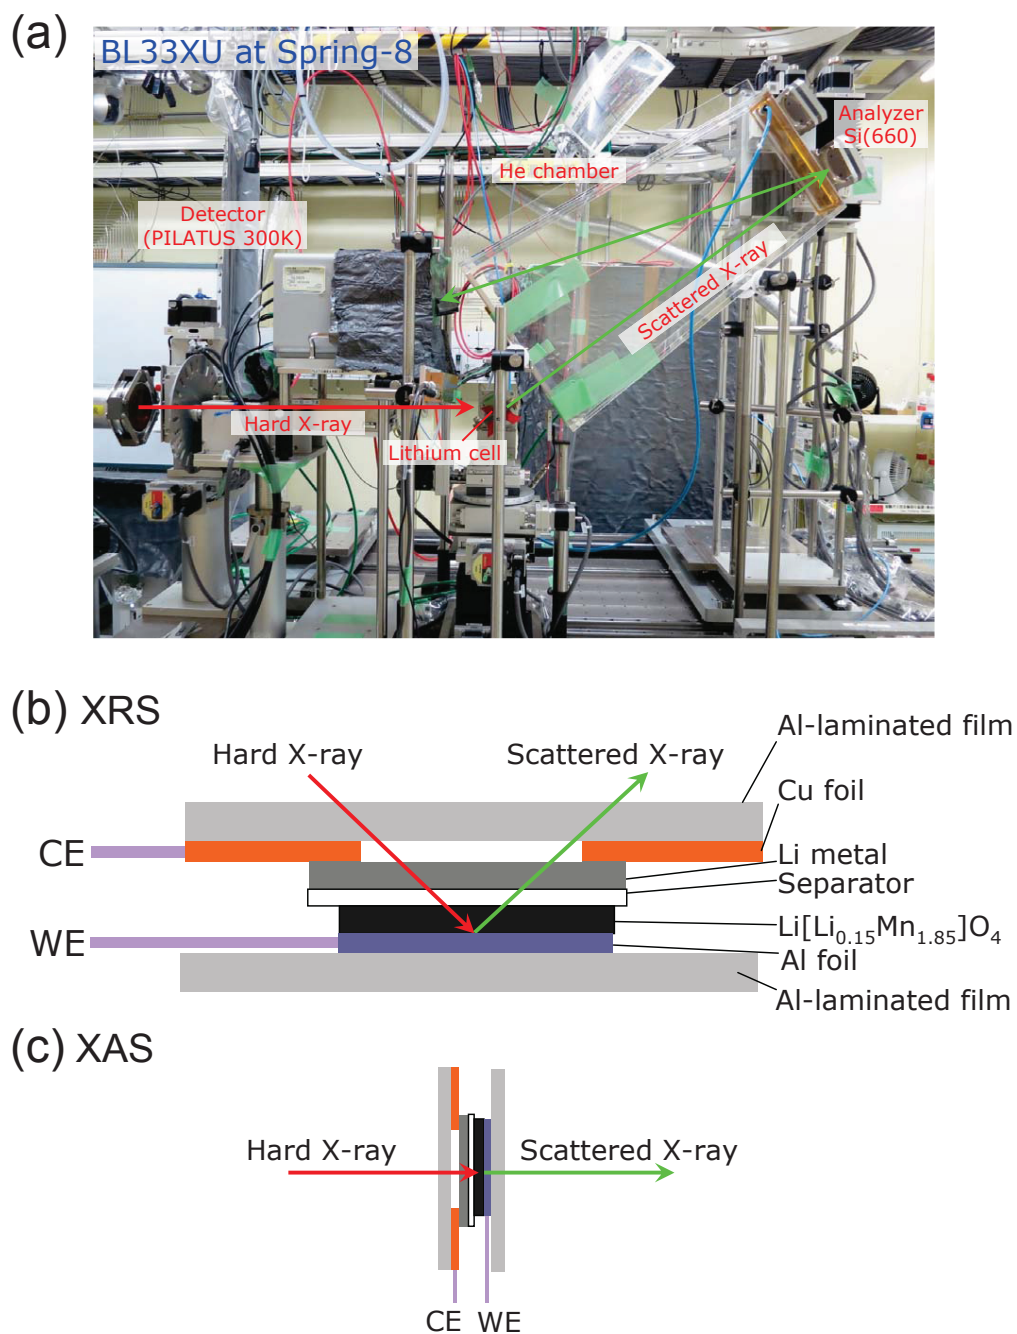

**Fig. S2:** (a) Setup of in situ XRS measurements and schematic arrangements of the Al-laminated cell for the (b) XRS and (c) XAS measurements.

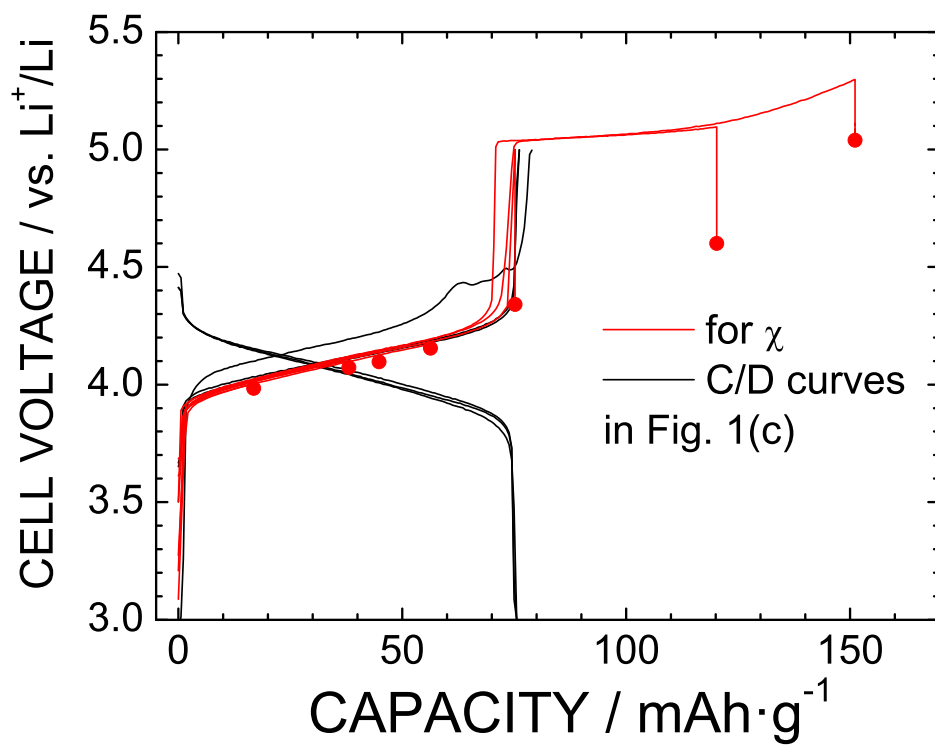

**Fig. S3:** Charge/discharge (C/D) curves for the  $\chi$  measurements. The closed circles indicate open circuit voltages just before  $\chi$  measurements. C/D curves in Fig. 1(c) are also shown for comparison.

**Table S1:** Structural parameters of the  $\text{Li}[\text{Li}_{0.15}\text{Mn}_{1.85}]\text{O}_4$  sample determined by Rietveld analysis

| Atom | Wyckoff position | Occupancy | $x$      | $y$      | $z$      | $B_{\text{iso}} / \text{\AA}^2$ |
|------|------------------|-----------|----------|----------|----------|---------------------------------|
| Li1  | $8a$             | 1.0       | 0.125    | 0.125    | 0.125    | 0.9(1)                          |
| Li2  | $16d$            | 0.075     | 0.5      | 0.5      | 0.5      | 0.8(1)                          |
| Mn1  | $16d$            | 0.925     | 0.5      | 0.5      | 0.5      | 0.8(1)                          |
| O    | $32e$            | 1.0       | 0.262(1) | 0.262(1) | 0.262(1) | 1.8(1)                          |

Space group:  $Fd\bar{3}m$ ,  $a_c = 8.1899(1)$  \AA,  $R_{\text{wp}} = 2.82$  %, and  $S = 1.27$ .



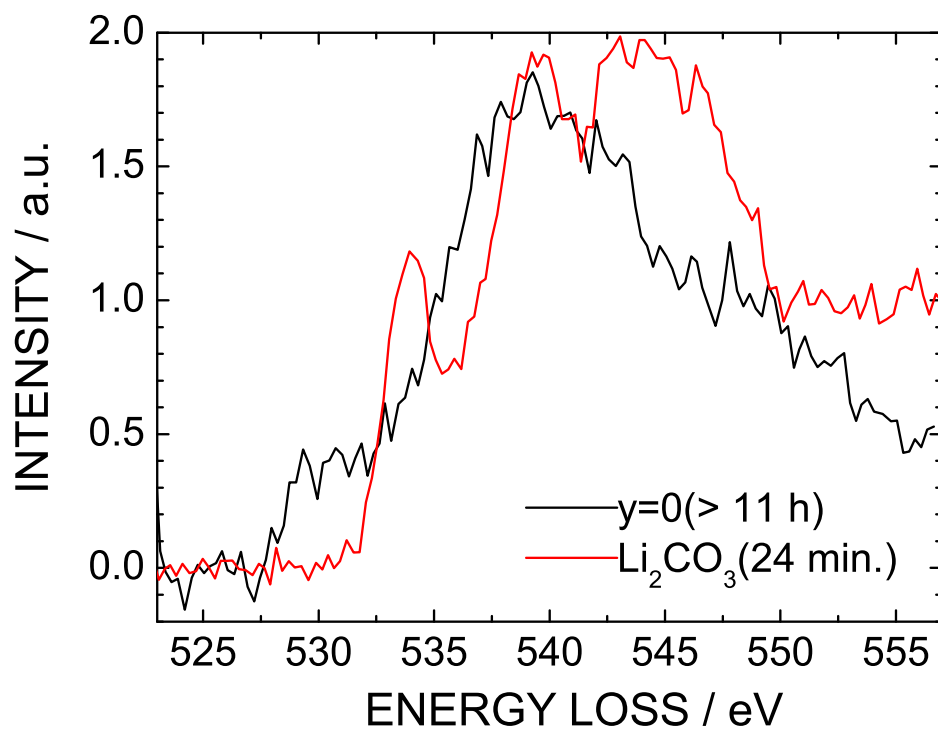

**Fig. S4:** O *K*-edge spectrum of  $\text{Li}_2\text{CO}_3$  obtained by the XRS measurement. O *K*-edge spectrum of the  $\text{Li}_{1-y}[\text{Li}_{0.15}\text{Mn}_{1.85}]\text{O}_4$  ( $y = 0$ ) sample is also shown for comparison.

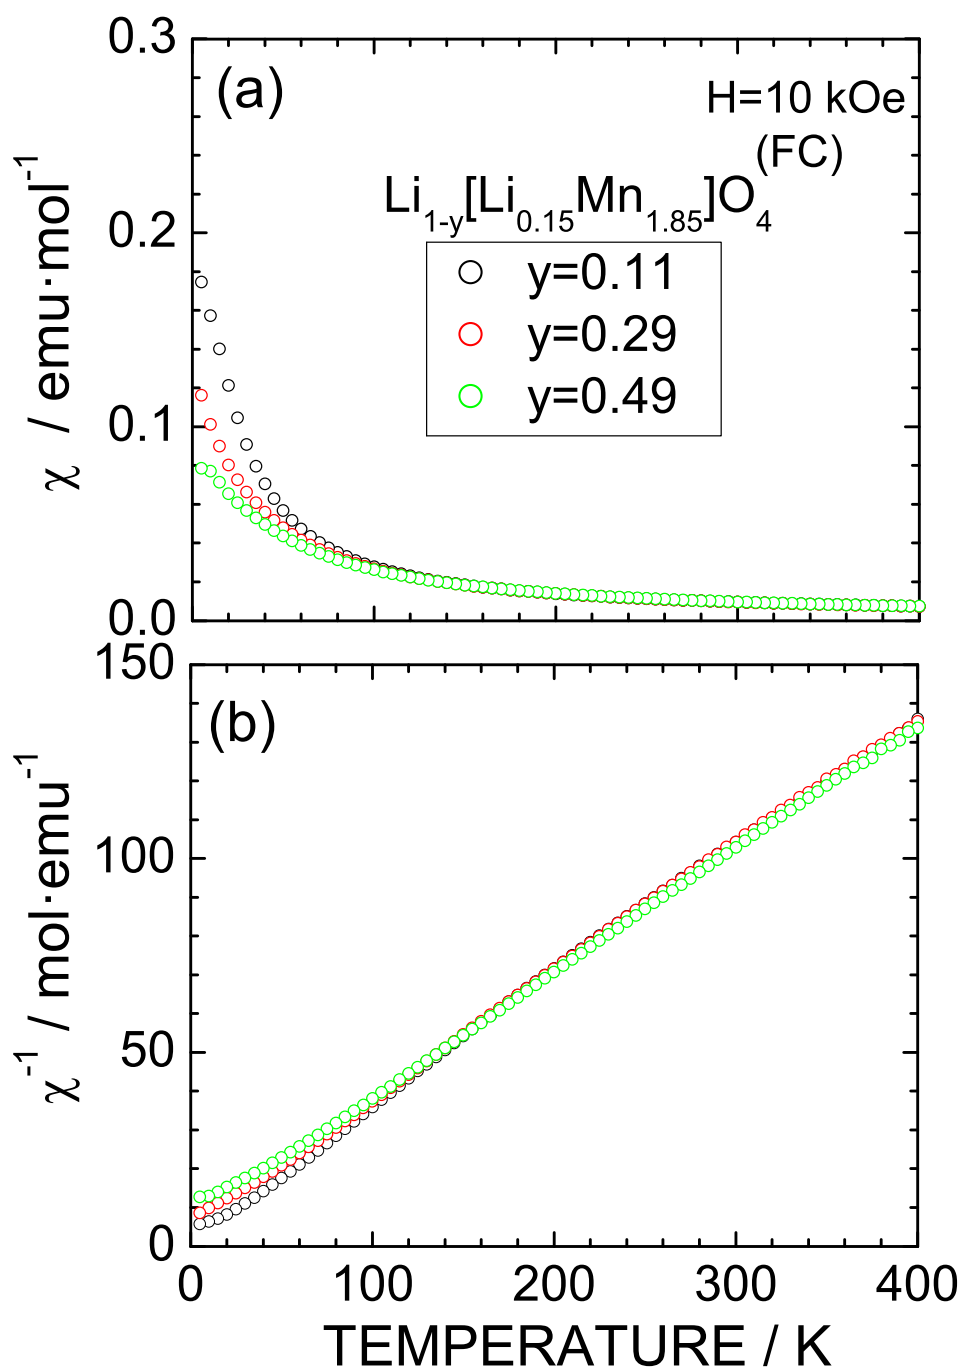

**Fig. S5:** (a)  $\chi$  and (b)  $\chi^{-1}$  of the  $y = 0.11$ , 0.22, and 0.49 samples measured in field-cooling mode with  $H = 10$  kOe.

**Table S2:** Curie–Weiss parameters of the  $\text{Li}_{1-y}[\text{Li}_{0.15}\text{Mn}_{1.85}]\text{O}_4$  samples

| $y$  | OCV / V | $\mu_{\text{eff}} / \mu_{\text{B}}$ | $\Theta_{\text{p}} / \text{K}$ |
|------|---------|-------------------------------------|--------------------------------|
| 0    | –       | 3.93(2)                             | –62(3)                         |
| 0.11 | 3.985   | 3.84(4)                             | –19(2)                         |
| 0.25 | 4.073   | 3.62(4)                             | –11(1)                         |
| 0.29 | 4.098   | 3.57(2)                             | –12(1)                         |
| 0.38 | 4.154   | 3.56(3)                             | –13(2)                         |
| 0.49 | 4.341   | 3.56(4)                             | –13(1)                         |
| 0.78 | 4.601   | 3.57(3)                             | –19(1)                         |
| 0.98 | 5.039   | 3.68(3)                             | –40(1)                         |

## References

- [1] K. Mukai, J. Sugiyama, Y. Ikedo, H. Nozaki, K. Kamazawa, D. Andreica, A. Amato, M. Månsson, J. H. Brewer, E. J. Ansaldo and K. H. Chow, *J. Phys. Chem. C*, 2010, **114**, 11320.
- [2] F. Izumi and K. Momma, *Solid State Phenom.*, 2007, **130**, 15.
- [3] K. Momma and F. Izumi, *J. Appl. Crystallogr.*, 2011, **44**, 1272.
- [4] T. Nonaka, H. Kawaura, Y. Makimura, Y. F. Nishimura and K. Dohmae, *J. Power Sources*, 2019, **419**, 203.
- [5] K. Mukai and J. Sugiyama, *Solid State Commun.*, 2010, **150**, 906.
- [6] K. Mukai and J. Sugiyama, *Phys. Chem. Chem. Phys.*, 2015, **17**, 22652.
